# Supplementary material for: Comparing Fire Extent and Severity Mapping between Sentinel 2 and Landsat 8 Satellite Sensors
Source: MDPI journal article supplement (doi:10.3390/rs14071661), 2022-03-30
Supplement: s1 [file s1]

# Supplementary Material

**Table S1.** Details of Sentinel 2 and Landsat 8 imagery used to map the 27 case study fires

| Fire name         | Fire Start date | Fire End date | Sentinel 2 pre-fire scene and date | Sentinel 2 post-fire scene and date | Landsat 8 pre-fire scene and date | Landsat 8 post-fire scene and date |
|-------------------|-----------------|---------------|------------------------------------|-------------------------------------|-----------------------------------|------------------------------------|
| Rockview          | 20190808        | 20190825      | t56jmn_20190804                    | t56jmn_20190902                     | 89/81_20190802                    | 89/81_20190903                     |
| Raspberry Rd      | 20190907        | 20191027      | t56jmm_20190903                    | t56jmm_20191106                     | 89/81_20190903                    | 89/81_20191106                     |
| Crown Mtn         | 20191202        | 20191224      | t56jlm_20191106                    | t56jlm_20200105                     | 89/81_20191106                    | 89/81_20200109                     |
| Kaputar Rd        | 20191017        | 20191204      | t56jkm_20191007                    | t56jkm_20191206                     | 91/81_20191003                    | 91/81_20191206                     |
| Hottes Rd         | 20190904        | 20190908      | t56jkn_20190818                    | t56jkn_20190922                     | 91/80_20190816                    | 91/80_20190917                     |
| Carrot Farm Rd    | 20191211        | 20191225      | t56jmn_20191206                    | t56jmn_20200105                     | 89/81_20191208                    | 89/81_20200109                     |
| Meads Ck West     | 20191126        | 20200122      | t56hkk_20191106                    | t56hkk_20200130                     | 90/82_20191113                    | 90/82_20200201                     |
| Crumps Complex    | 20191127        | 20200124      | t56hlj_20191106                    | t56hlj_20200219                     | 89/83_20191106                    | 90/83_20200217                     |
| Forest Rd         | 20191217        | 20200206      | t56hkg_20191121                    | t56hkg_20200224                     | 90/84_20191113                    | 90/84_20200217                     |
| Nine Mile Complex | 20191229        | 20200125      | t55hfv_20191129                    | t55hfv_20200204                     | 91/86_20191120                    | 91/86_20200123                     |
| Yellow Bog Rd     | 20200109        | 20200207      | t55hfa_20191216                    | t55hfa_20200227                     | 91/85_20191222                    | 91/85_20200224                     |
| Arkstone Rd       | 20191126        | 20191209      | t55hgc_20191106                    | t55hgc_20191226                     | 90/84_20191113                    | 90/84_20191231                     |
| Clarence Way      | 20190809        | 20190825      | t56jmn_20190808                    | t56jmn_20190907                     | 89/81_20190802                    | 89/81_20190903                     |
| Bangala Ck        | 20191204        | 20200115      | t56jmp_20191116                    | t56jmp_20200320                     | 90/80_20191113                    | 90/80_20200320                     |
| Mummel Fire       | 20191202        | 20200115      | t56jll_20191106                    | t56jll_20200320                     | 89/82_20191106                    | 89/82_20200313                     |
| Yearinan Station  | 20200109        | 20200121      | t55jgf_20200108                    | t55jgf_20200313                     | 91/82_20200107                    | 91/82_20200311                     |
| Hamilton Rd       | 20180727        | 20180817      | t56hlh_20180714                    | t56hlh_20180912                     | 89/84_20180714                    | 89/84_20180916                     |
| Orroral           | 20200127        | 20200227      | t55hfa_20191216                    | t55hfa_20200320                     | 90/85_20191215                    | 90/85_20200320                     |
| Halls Creek Rd    | 20190103        | 20190204      | t56jll_20181231                    | t56jll_20190219                     | 90/81_20181228                    | 90/81_20190214                     |
| Carters Rd        | 20191123        | 20200128      | t56hlk_20191106                    | t56hlk_20200130                     | 89/82_20191106                    | 90/82_20200201                     |
| Mirrie Rd         | 20200122        | 20200206      | t55hfe_20200108                    | t55hfe_20200313                     | 91/82_20200107                    | 91/82_20200311                     |
| Moonbi Range      | 20191112        | 20191209      | t56jll_20191106                    | t56jll_20200105                     | 90/81_20191028                    | 90/81_20191231                     |
| Dunns Rd          | 20191228        | 20200215      | t55hfa_20191216                    | t55hfa_20200315                     | 91/85_20191222                    | 91/85_20200311                     |
| Campbells Ck      | 20191207        | 20191224      | t56jkg_20191116                    | t56jkg_20200110                     | 90/80_20191113                    | 90/80_20191231                     |
| Goddos Rd         | 20191027        | 20191128      | t56jll_20191007                    | t56jll_20191206                     | 90/82_20190926                    | 90/82_20191215                     |
| Braidwood Rd      | 20190526        | 20190605      | t56hkg_20190430                    | t56hkg_20190629                     | 90/84_20190505                    | 90/84_20190708                     |
| Wrights Ck        | 20191126        | 20191206      | t56hlj_20191106                    | t56hlj_20191226                     | 90/83_20191113                    | 90/83_20191231                     |

**Table S2.** Spectral and texture indices used in the Random Forest model to map fire extent and severity within the study. Formulas for the calculation of spectral indices are shown beneath the table.

| Index name  | Description                                         |
|-------------|-----------------------------------------------------|
| dNBR        | differenced Normalised Burn Ratio                   |
| mean_dNBR_5 | mean dNBR calculated within 5x5 pixel kernel        |
| mean_dNBR_7 | mean dNBR calculated within 7x7 pixel kernel        |
| var_dNBR_5  | variance of dNBR calculated within 5x5 pixel kernel |
| var_dNBR_7  | variance of dNBR calculated within 7x7 pixel kernel |
| RdNBR       | relativised dNBR                                    |
| dFCB        | change in Bare Fractional Cover                     |
| mean_dFCB_5 | mean dFCB calculated within 5x5 pixel kernel        |
| mean_dFCB_7 | mean dFCB calculated within 7x7 pixel kernel        |
| var_dFCB_5  | variance of dFCB calculated within 5x5 pixel kernel |
| var_dFCB_7  | variance of dFCB calculated within 7x7 pixel kernel |
| RdFCT       | relativised change in Total Fractional Cover        |

$$preNBR = \left( \frac{pre\ NIR - pre\ SWIR}{pre\ NIR + pre\ SWIR} \right)$$

$$postNBR = \left( \frac{post\ NIR - post\ SWIR}{post\ NIR + post\ SWIR} \right)$$

$$dNBR = preNBR - postNBR$$

$$ABS\ pre\ NBR = |preNBR|$$

$$RdNBR = \left( \frac{dNBR}{sqrt(ABS\ pre\ NBR)} \right)$$

$$dFCB = post\ Bare - pre\ Bare$$

$$pre\ Total = pre\ Green + pre\ Non\ Green$$

$$post\ Total = post\ Green + post\ Non\ Green$$

$$RdFCT = \frac{pre\ Total - post\ Total}{sqrt(pre\ Total)}$$

Where: 'pre' refers to spectral values derived from pre-fire imagery, and: 'post' refers to spectral values derived from post-fire imagery

**Table S3.** Details of aerial imagery used to manually classify each of the 8 training fires.

| Fire name    | Fire Start date | Fire End date | Aerial photography | Aerial photography date |
|--------------|-----------------|---------------|--------------------|-------------------------|
| Sir Ivan     | 20170211        | 20170217      | 50 cm 4-band ADS   | 20170218                |
| White Cedars | 20170212        | 20170217      | 20 cm 4-band ADS   | 20170216                |
| Wollemi      | 20180128        | 20180215      | 50 cm 4-band ADS   | 20180317                |
| Mt Canobolas | 20180210        | 20180216      | 30 cm 4-band ADS   | 20180309                |
| Sir Bertram  | 20180120        | 20180125      | 50 cm 4-band ADS   | 20180311                |
| Pilliga      | 20180119        | 20180125      | 50 cm 4-band ADS   | 20180311                |
| Tathra       | 20180318        | 20180319      | 10 cm 4-band ADS   | 20180320                |
| Holsworthy   | 20180413        | 20180418      | 50 cm 4-band ADS   | 20180424                |

**Table S4.** Balanced accuracy statistics for Sentinel 2 and Landsat 8 FESM algorithms for each of the 8 training fires.

#### Sentinel 2

| Fire name    | Size (ha) | # sample points | Balanced accuracy |       |          |       |         |         |
|--------------|-----------|-----------------|-------------------|-------|----------|-------|---------|---------|
|              |           |                 | Unburnt           | Low   | Moderate | High  | Extreme | Overall |
| Sir Bertram  | 2241      | 8656            | 0.995             | 0.825 | 0.538    | 0.748 | 0.983   | 0.840   |
| Holsworthy   | 3955      | 7722            | 0.985             | 0.798 | 0.729    | 0.763 | 0.939   | 0.766   |
| Mt Canobolas | 1891      | 10782           | 0.944             | 0.872 | 0.612    | 0.933 | 0.937   | 0.832   |
| Sir Ivan     | 47105     | 17750           | 0.945             | 0.729 | 0.671    | 0.804 | 0.958   | 0.787   |
| White Cedars | 5217      | 18106           | 0.979             | 0.908 | 0.726    | 0.915 | 0.933   | 0.903   |
| Tathra       | 1258      | 3131            | 0.967             | 0.845 | 0.726    | 0.842 | 0.972   | 0.773   |
| Wollemi      | 14178     | 25427           | 0.989             | 0.831 | 0.648    | 0.906 | 0.949   | 0.831   |
| Pilliga      | 57822     | 79076           | 0.998             | 0.804 | 0.592    | 0.774 | 0.605   | 0.668   |
| average      | 16708     | 21331           | 0.975             | 0.827 | 0.655    | 0.836 | 0.909   | 0.800   |

#### Landsat 8

| Fire name    | Size (ha) | # sample points | Balanced accuracy |       |          |       |         |         |
|--------------|-----------|-----------------|-------------------|-------|----------|-------|---------|---------|
|              |           |                 | Unburnt           | Low   | Moderate | High  | Extreme | Overall |
| Sir Bertram  | 2241      | 8656            | 0.994             | 0.958 | 0.884    | 0.745 | 0.711   | 0.633   |
| Holsworthy   | 3955      | 7722            | 0.992             | 0.939 | 0.576    | 0.815 | 0.925   | 0.816   |
| Mt Canobolas | 1891      | 10782           | 0.958             | 0.883 | 0.747    | 0.758 | 0.867   | 0.841   |
| Sir Ivan     | 47105     | 17750           | 0.885             | 0.662 | 0.609    | 0.644 | 0.954   | 0.834   |
| White Cedars | 5217      | 18106           | 0.996             | 0.949 | 0.756    | 0.916 | 0.960   | 0.909   |
| Tathra       | 1258      | 3131            | 0.970             | 0.945 | 0.771    | 0.816 | 0.854   | 0.786   |
| Wollemi      | 14178     | 25427           | 0.973             | 0.739 | 0.768    | 0.835 | 0.925   | 0.736   |
| Pilliga      | 57822     | 79076           | 0.988             | 0.877 | 0.640    | 0.902 | 0.964   | 0.945   |
| average      | 16708     | 21331           | 0.959             | 0.861 | 0.669    | 0.787 | 0.895   | 0.823   |
